# Supplementary material for: EnhancerPred2.0: predicting enhancers and their strength based on position-specific trinucleotide propensity and electron–ion interaction potential feature selection
Source: Royal Society of Chemistry journal article supplement (doi:10.1039/c7mb00054e), 2017-02-20
Supplement: c7mb00054e1.pdf [file c7mb00054e1.pdf]

Table S1 Predictive performances of models trained on combination of 126 features from PSTNP and features selected by different F-score thresholds of EIIP for identifying enhancers and non-enhancers.

| Threshold   | Number of features from EIIP | Sn(%)        | Sp(%)        | Acc(%)       | MCC           |
|-------------|------------------------------|--------------|--------------|--------------|---------------|
| 0.01        | 55                           | 87.60        | 87.53        | 87.57        | 0.7513        |
| 0.02        | 49                           | 88.01        | 88.01        | 88.01        | 0.7601        |
| 0.03        | 47                           | 88.14        | 88.27        | 88.21        | 0.7602        |
| 0.04        | 39                           | 87.80        | 88.27        | 88.04        | 0.7608        |
| <b>0.05</b> | <b>32</b>                    | <b>87.94</b> | <b>88.61</b> | <b>88.27</b> | <b>0.7655</b> |
| 0.06        | 27                           | 87.47        | 87.13        | 87.30        | 0.7460        |
| 0.07        | 22                           | 87.94        | 87.74        | 87.84        | 0.7567        |
| 0.09        | 20                           | 87.74        | 87.53        | 87.63        | 0.7527        |
| 0.1         | 17                           | 85.11        | 86.52        | 85.82        | 0.7164        |

Table S2 Predictive performances of models trained on different number of features from EIIP combined with PSTNP(126)+EIIP for identifying enhancers and non-enhancers.

| Number of features from EIIP | Sn(%)        | Sp(%)        | Acc(%)       | MCC           |
|------------------------------|--------------|--------------|--------------|---------------|
| 28                           | 87.40        | 87.80        | 87.60        | 0.7520        |
| 30                           | 87.74        | 88.07        | 87.90        | 0.7581        |
| <b>32</b>                    | <b>87.94</b> | <b>88.61</b> | <b>88.27</b> | <b>0.7655</b> |
| 34                           | 87.94        | 88.41        | 88.17        | 0.7635        |
| 36                           | 87.80        | 88.34        | 88.07        | 0.7615        |
| 38                           | 87.74        | 88.27        | 88.01        | 0.7601        |

Table S3 Predictive performances of models trained on features selected by different F-score thresholds of PSTNP for identifying strong enhancers and weak enhancers.

| Threshold   | Number of features from PSTNP | Sn(%)        | Sp(%)        | Acc(%)       | MCC           |
|-------------|-------------------------------|--------------|--------------|--------------|---------------|
| 0.06        | 8                             | 82.35        | 47.84        | 65.09        | 0.3216        |
| 0.055       | 25                            | 85.04        | 78.44        | 81.74        | 0.6362        |
| 0.05        | 49                            | 86.66        | 83.83        | 85.24        | 0.7051        |
| 0.045       | 87                            | 91.64        | 88.68        | 90.16        | 0.8036        |
| 0.04        | 129                           | 91.64        | 90.97        | 91.31        | 0.8262        |
| 0.035       | 171                           | 92.72        | 90.03        | 91.37        | 0.8278        |
| 0.03        | 191                           | 92.72        | 90.16        | 91.44        | 0.8291        |
| <b>0.02</b> | <b>198</b>                    | <b>92.72</b> | <b>90.30</b> | <b>91.51</b> | <b>0.8304</b> |

Table S4 Predictive performances of models trained on features selected by different F-score thresholds of EIIP and PSTNP(198) for identifying strong enhancers and weak enhancers.

| Threshold    | Number of features from EIIP | Sn(%)        | Sp(%)        | Acc(%)       | MCC           |
|--------------|------------------------------|--------------|--------------|--------------|---------------|
| 0.04         | 7                            | 95.69        | 94.74        | 95.22        | 0.9044        |
| 0.03         | 8                            | 96.36        | 95.55        | 95.96        | 0.9192        |
| 0.02         | 16                           | 96.77        | 96.63        | 96.70        | 0.9340        |
| 0.01         | 25                           | 97.44        | 97.84        | 97.64        | 0.9528        |
| <b>0.005</b> | <b>37</b>                    | <b>97.98</b> | <b>98.11</b> | <b>98.05</b> | <b>0.9609</b> |
| 0.004        | 38                           | 97.98        | 98.11        | 98.05        | 0.9609        |
| 0.003        | 44                           | 97.84        | 97.98        | 97.91        | 0.9582        |
| 0.002        | 50                           | 97.98        | 98.11        | 98.05        | 0.9609        |
| 0.001        | 53                           | 97.98        | 97.98        | 97.98        | 0.9596        |

Table S5 Comparison prediction results of different k neighbors.

| k         | Sn(%)        | Sp(%)        | Acc(%)       | MCC           |
|-----------|--------------|--------------|--------------|---------------|
| 15        | 79.51        | 82.01        | 80.76        | 0.6154        |
| 23        | 80.32        | 82.14        | 81.23        | 0.6248        |
| 31        | 81.00        | 81.60        | 81.30        | 0.6260        |
| 39        | 80.86        | 81.40        | 81.13        | 0.6227        |
| 45        | 81.33        | 81.33        | 81.33        | 0.6267        |
| 47        | 81.60        | 81.54        | 81.57        | 0.6314        |
| <b>49</b> | <b>81.81</b> | <b>81.40</b> | <b>81.60</b> | <b>0.6321</b> |
| 51        | 81.81        | 81.33        | 81.57        | 0.6314        |
| 55        | 81.74        | 81.06        | 81.40        | 0.6280        |

Table S6 Comparison prediction results of different k neighbors.

| k         | Sn(%)        | Sp(%)        | Acc(%)       | MCC           |
|-----------|--------------|--------------|--------------|---------------|
| 11        | 90.57        | 91.64        | 91.11        | 0.8222        |
| 19        | 91.78        | 91.64        | 91.71        | 0.8342        |
| 25        | 92.72        | 91.51        | 92.12        | 0.8424        |
| <b>27</b> | <b>93.13</b> | <b>91.37</b> | <b>92.25</b> | <b>0.8451</b> |
| 29        | 93.13        | 91.11        | 92.12        | 0.8425        |
| 35        | 92.45        | 90.97        | 91.71        | 0.8343        |
| 45        | 92.18        | 90.70        | 91.44        | 0.8289        |

Table S7 Comparison prediction results of different nTrees

| Random Forest<br>(nTree) | Sn(%) | Sp(%) | Acc(%) | MCC    |
|--------------------------|-------|-------|--------|--------|
| Random Forest(50)        | 76.01 | 80.53 | 78.27  | 0.5659 |
| Random Forest(100)       | 78.17 | 81.00 | 79.58  | 0.5919 |
| Random Forest(200)       | 77.49 | 81.60 | 79.55  | 0.5915 |

Table S8 Comparison prediction results of different nTrees.

| Random Forest<br>(nTree) | Sn(%) | Sp(%) | Acc(%) | MCC    |
|--------------------------|-------|-------|--------|--------|
| Random Forest(50)        | 86.12 | 84.10 | 85.11  | 0.7023 |
| Random Forest(100)       | 87.74 | 86.52 | 87.13  | 0.7426 |
| Random Forest(200)       | 88.81 | 86.25 | 87.53  | 0.7509 |

Supplement table:

Table S9 Rules of composition of heat maps (Fig.4 and Fig.5)

|     |     |     |     |     |     |     |     |
|-----|-----|-----|-----|-----|-----|-----|-----|
| AAA | AAC | ACA | ACC | CAA | CAC | CCA | CCC |
| AAG | AAT | ACG | ACT | CAG | CAT | CCG | CCT |
| AGA | AGC | ATA | ATC | CGA | CGA | CTA | CTC |
| AGG | AGT | ATG | ATT | CGG | CGT | CTG | CTT |
| GAA | GAC | GCA | GCC | TAA | TAC | TCA | TCC |
| GAG | GAT | GCG | GCT | TAG | TAT | TCG | TCT |
| GGA | GGC | GTA | GTC | TGA | TGC | TTA | TTC |
| GGG | GGT | GTG | GTT | TGG | TGT | TTG | TTT |
